# Supplementary material for: Oxidation of allylic alcohols to α,β-unsaturated carbonyl compounds with aqueous hydrogen peroxide under organic solvent-free conditions
Source: Royal Society of Chemistry journal article supplement (doi:10.1039/b708612a), 2007-01-01
Supplement: b708612a.pdf [file b708612a.pdf]

Electronic Supplementary Information for Chemical Communications

## **Oxidation of Allylic Alcohols to $\alpha,\beta$ -Unsaturated Carbonyl Compounds with Aqueous Hydrogen Peroxide under Organic Solvent-Free Conditions**

Yoshihiro Kon, Yoko Usui, and Kazuhiko Sato \*

*National Institute of Advanced Industrial Science and Technology (AIST), Central 5 Higashi  
1-1-1, Tsukuba, Ibaraki, Japan.*

Fax: +81-29-861-4852; Tel: +81-29-861-4852; E-mail: k.sato@aist.go.jp

### **Contents**

1. Instrumentation and Chemicals
2. Experimental Procedure
3. Characterization Data for Compounds

#### **1. Instrumentation and Chemicals**

$^1\text{H}$  NMR (500 MHz) and  $^{13}\text{C}$  NMR (125 MHz) spectra were recorded on JEOL winLambda-500 NMR spectrometers. Chemical shifts ( $\delta$ ) are in parts per million relative to tetramethylsilane at 0.00 ppm for  $^1\text{H}$  and relative to residual  $\text{CHCl}_3$  at 77.0 ppm for  $^{13}\text{C}$  unless otherwise noted. Gas chromatographic (GC) analyses were performed on a Shimadzu GC-17A using an TC-FFAP column (0.25 mm x 30 m, GL Sciences Inc.).

All materials were used as received. Cinnamyl alcohol, *trans*-2-hexen-1-ol, *trans*-2-octen-1-ol, *trans*-2-decen-1-ol, *cis*-2-hexen-1-ol, 3-methyl-2-buten-1-ol, geraniol, *trans*-3-octen-2-ol, benzyl alcohol, 1-hexen-3-ol, 1-octen-4-ol, 2-hexanol, 2-octanol were obtained from Tokyo Chemical Industry Co., Ltd. 2-Butanol and cyclohexanol were obtained

from Wako Pure Chemicals Ind., Ltd. 30% Hydrogen peroxide was obtained from Kanto Chemical Co., Inc. 6-Methyl-5-hepten-2-ol was obtained from Aldrich Chemical Co. Platinum black was obtained from N. E. CHEMCAT Co.

## 2. Experimental Procedure

### Typical procedure (hectogram-scale oxidation of cinnamyl alcohol)

A 1-liter round-bottomed flask equipped with a magnetic stirring bar and a reflux condenser was slowly charged with 100 g (0.745 mol) of cinnamyl alcohol and 1.45 g (7.45 mmol) of Pt black. After the mixture was vigorously stirred at 90 °C for 10 min, 558 g (0.820 mol) of aqueous 5% H<sub>2</sub>O<sub>2</sub> was added dropwise. The mixture was heated at 90 °C for 3 h, and then cooled to room temperature. The organic phase was separated and washed with 50 mL of saturated aqueous Na<sub>2</sub>S<sub>2</sub>O<sub>3</sub>. After distillation, 92.6 g (0.701 mol, 94% yield) of cinnamaldehyde was obtained as a colorless liquid.

### General Procedure for oxidation of allylic alcohol

A 30-mL round bottomed flask equipped with a magnetic stirring bar and a reflux condenser was charged with 10.0 mmol of allylic alcohol and 19.5 mg (0.100 mmol) of Pt black. After the mixture was vigorously stirred at 90 °C for 10 min, 7.48 g (11.0 mmol) of aqueous 5% H<sub>2</sub>O<sub>2</sub> was added dropwise over the course of 1 h. The mixture was heated at 90 °C for 2 h, and then cooled to room temperature. The organic phase was separated and washed with 2.5 mL of saturated aqueous Na<sub>2</sub>S<sub>2</sub>O<sub>3</sub>. The conversion and yield were determined by running the reaction with 4 mmol of internal standard, typically biphenyl.

## 3. Characterization Data for Compounds

**Cinnamaldehyde**<sup>1</sup>: b.p. 104 °C/7 mmHg; <sup>1</sup>H NMR (CDCl<sub>3</sub>): δ 6.52 (dd, 1H, *J* = 15.9, *J* = 7.6 Hz), 7.21–7.26 (m, 4H), 7.34–7.37 (m, 2H); 9.51 (d, 1H, *J* = 7.6 Hz); <sup>13</sup>C NMR (CDCl<sub>3</sub>) δ 128.4, 129.2, 131.1, 133.9, 152.8, 193.5.

**trans-2-Hexenal**<sup>2</sup>: <sup>1</sup>H NMR (CDCl<sub>3</sub>): δ 0.96 (t, 3H, *J* = 8.8 Hz), 1.49–1.57 (m, 2H), 2.27–2.34 (m, 2H), 6.11 (ddt, 1H, *J* = 1.4, *J* = 7.9, *J* = 15.6 Hz), 6.84 (dt, 1H, *J* = 6.7, *J* = 15.6 Hz), 9.50 (d,

1H,  $J = 7.9$  Hz);  $^{13}\text{C}$  NMR ( $\text{CDCl}_3$ )  $\delta$  13.6, 21.1, 34.6, 133.0, 158.5, 193.9.

**trans-2-Octenal**<sup>3</sup>:  $^1\text{H}$  NMR ( $\text{CDCl}_3$ ):  $\delta$  0.91 (t, 3H,  $J = 7.8$  Hz), 1.29–1.37 (m, 4H), 1.47–1.55 (m, 2H), 2.30–2.37 (m, 2H), 6.12 (ddt, 1H,  $J = 1.4$ ,  $J = 6.9$ ,  $J = 15.4$  Hz), 6.86 (dt, 1H,  $J = 6.7$ ,  $J = 15.4$  Hz), 9.51 (d, 1H,  $J = 6.9$  Hz);  $^{13}\text{C}$  NMR ( $\text{CDCl}_3$ )  $\delta$  13.9, 22.3, 27.5, 31.3, 32.6, 132.9, 158.8, 193.9.

**trans-2-Decenal**<sup>4</sup>:  $^1\text{H}$  NMR ( $\text{CDCl}_3$ ):  $\delta$  0.89 (t, 3H,  $J = 6.7$  Hz), 1.25–1.35 (m, 8H), 1.45–1.53 (m, 2H), 2.30–2.37 (m, 2H), 6.12 (dd, 1H,  $J = 7.9$ ,  $J = 15.6$  Hz), 6.86 (dt, 1H,  $J = 6.9$ ,  $J = 15.6$  Hz), 9.51 (d, 1H,  $J = 7.9$  Hz);  $^{13}\text{C}$  NMR ( $\text{CDCl}_3$ )  $\delta$  14.0, 22.6, 27.9, 29.0, 29.1, 31.7, 32.7, 132.9, 158.7, 193.8.

**cis-2-Hexenal**<sup>5</sup>:  $^1\text{H}$  NMR ( $\text{CDCl}_3$ ):  $\delta$  0.94 (t, 3H,  $J = 6.2$  Hz), 1.46–1.58 (m, 2H), 2.18–2.23 (m, 2H), 5.90–6.05 (m, 1H), 6.60 (dt, 1H,  $J = 6.7$ ,  $J = 15.4$  Hz), 10.05 (d, 1H,  $J = 7.9$  Hz);  $^{13}\text{C}$  NMR ( $\text{CDCl}_3$ )  $\delta$  13.6, 21.0, 34.6, 130.0, 153.0, 191.1.

**3-Methyl-2-butenal**<sup>6</sup>:  $^1\text{H}$  NMR ( $\text{CDCl}_3$ ):  $\delta$  1.99 (s, 3H), 2.18 (s, 3H), 5.89 (dq, 1H,  $J = 6.7$ ,  $J = 2.4$  Hz), 9.96 (d, 1H,  $J = 6.7$  Hz);  $^{13}\text{C}$  NMR ( $\text{CDCl}_3$ )  $\delta$  18.9, 28.1, 128.1, 160.3, 190.8.

**3,7-Dimethylocta-2E,6-dienal (Geranial)**<sup>7</sup>:  $^1\text{H}$  NMR ( $\text{CDCl}_3$ ):  $\delta$  1.61 (s, 3H), 1.69 (s, 3H), 2.17 (s, 3H), 2.17–2.26 (m, 4H), 5.00–5.10 (m, 1H), 5.88 (d, 1H,  $J = 8.5$  Hz), 10.00 (d, 1H,  $J = 8.5$  Hz);  $^{13}\text{C}$  NMR ( $\text{CDCl}_3$ )  $\delta$  17.7, 17.8, 25.7, 25.8, 40.6, 122.5, 127.4, 132.9, 163.9, 191.3.

**trans-3-Octen-2-one**<sup>8</sup>:  $^1\text{H}$  NMR ( $\text{CDCl}_3$ ):  $\delta$  0.91 (t, 3H,  $J = 7.0$  Hz), 1.35 (tq, 2H,  $J = 7.0$ ,  $J = 7.2$  Hz), 1.43–1.47 (m, 2H), 2.10–2.25 (m, 5H), 6.07 (dt, 1H,  $J = 1.5$ ,  $J = 15.8$  Hz), 6.80 (dt, 1H,  $J = 6.7$ ,  $J = 15.8$  Hz);  $^{13}\text{C}$  NMR ( $\text{CDCl}_3$ )  $\delta$  13.8, 22.2, 26.7, 30.2, 32.1, 131.3, 148.5, 198.6.

**Benzaldehyde**<sup>9</sup>:  $^1\text{H}$  NMR ( $\text{CDCl}_3$ ):  $\delta$  7.53 (dd, 2H,  $J = 7.5$ ,  $J = 7.8$  Hz), 7.63 (dt, 1H,  $J = 1.5$ ,  $J = 7.5$  Hz), 7.88 (dd, 2H,  $J = 1.5$ ,  $J = 7.8$  Hz), 10.03 (s, 1H);  $^{13}\text{C}$  NMR ( $\text{CDCl}_3$ )  $\delta$  128.9, 129.7, 134.4, 136.4, 192.3.

## References

- 1) C. J. Pouchert and J. Behnke, "The Aldrich Library of  $^{13}\text{C}$  and  $^1\text{H}$  FT NMR Spectra," 1st ed, Aldrich Chemical, Milwaukee (1993), Vol. 2, p. 926-C.
- 2) C. J. Pouchert and J. Behnke, "The Aldrich Library of  $^{13}\text{C}$  and  $^1\text{H}$  FT NMR Spectra," 1st ed, Aldrich Chemical, Milwaukee (1993), Vol. 1, p. 736-C.

- 3) C. J. Pouchert and J. Behnke, "The Aldrich Library of  $^{13}\text{C}$  and  $^1\text{H}$  FT NMR Spectra," 1st ed, Aldrich Chemical, Milwaukee (1993), Vol. 1, p. 738-A.
- 4) C. J. Pouchert and J. Behnke, "The Aldrich Library of  $^{13}\text{C}$  and  $^1\text{H}$  FT NMR Spectra," 1st ed, Aldrich Chemical, Milwaukee (1993), Vol. 1, p. 739-B.
- 5) B. K. Eya, T. Otsuka, I. Kubo, and D. L. Wood, *Tetrahedron*, 1990, **46**, 2695.
- 6) C. J. Pouchert and J. Behnke, "The Aldrich Library of  $^{13}\text{C}$  and  $^1\text{H}$  FT NMR Spectra," 1st ed, Aldrich Chemical, Milwaukee (1993), Vol. 1, p. 735-B.
- 7) S. Fielder, D. D. Rowan, and M. S. Sherburn, *Tetrahedron*, 1998, **54**, 12907.
- 8) SDBSWeb: <http://www.aist.go.jp/RIODB/SDBS/> (National Institute of Advanced Industrial Science and Technology, Apr. 12, 2007)
- 9) K. Sato, M. Aoki, J. Takagi, K. Zimmermann, and R. Noyori, *Bull. Chem. Soc. Jpn.*, 1999, **72**, 2287.
